# Supplementary material for: Construction of a reporter system for bifidobacteria using chloramphenicol acetyltransferase and its application for evaluation of promoters and terminators
Source: PubMed Central journal article supplement — Biosci Microbiota Food Health. 2021 Jan 19;40(2):115–22. doi: 10.12938/bmfh.2020-070 (PMC8099631; doi:10.12938/bmfh.2020-070), 2021-01-19
Supplement: bmfh-40-115-s001.pdf [file bmfh-40-115-s001.pdf]

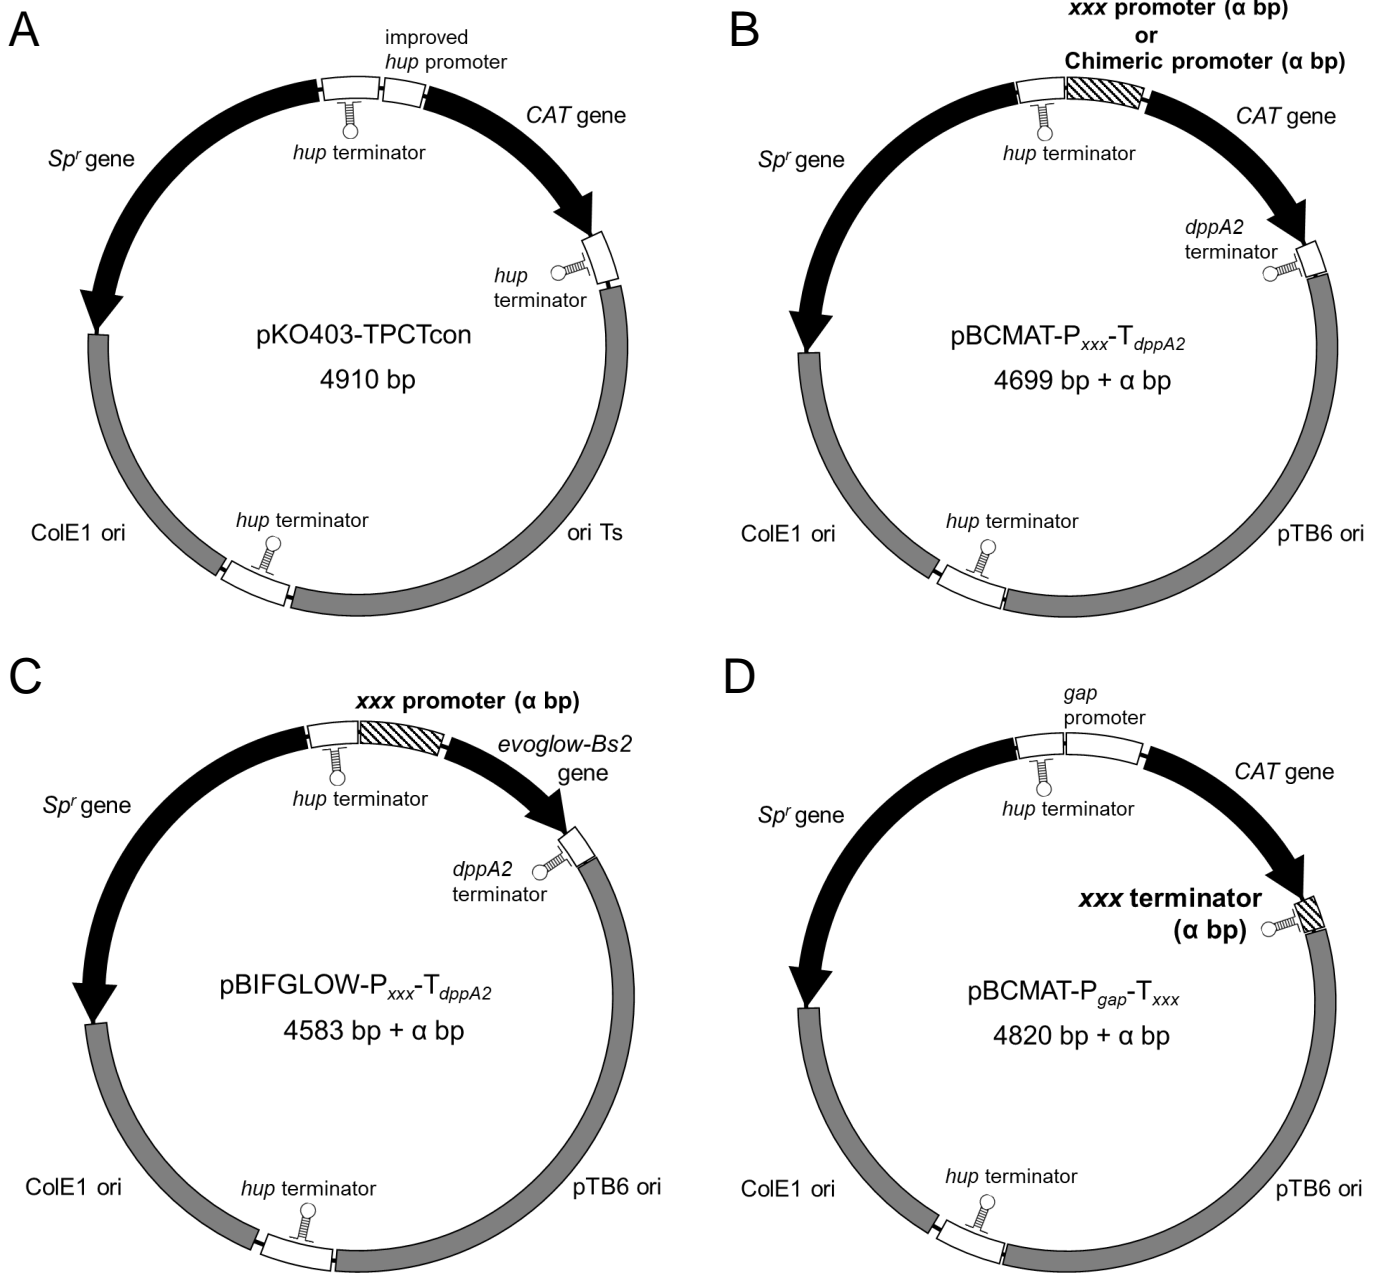

**Fig. S1. Plasmid constructions.**

**A:** pKO403-TPCTcon, used for the *CAT* assay in a previous study [1]. **B:** pBCMAT-P<sub>xxx</sub>-T<sub>dppA2</sub>, used for testing promoter activities with the *CAT* gene. **C:** pBIFGLOW-P<sub>xxx</sub>-T<sub>dppA2</sub>, used for testing promoter activities with the *evoglow-Bs2* gene. **D:** pBCMAT-P<sub>gap</sub>-T<sub>xxx</sub>, used for testing terminator activities with the *CAT* gene. *Sp<sup>r</sup>*: a resistance gene of spectinomycin. *ColE1 ori*: a replication origin for *Escherichia coli*. *pTB6 ori*: a replication origin for *Bifidobacterium* species. *CAT*: a gene-coding region of chloramphenicol acetyltransferase. *evoglow-Bs2*: a gene-coding region of evoglow-Bs2. *ori Ts*: temperature-sensitive replication origin.



Table S1. Bacterial strains and plasmids.

| Type              | Name                                               | Properties                                                                                                  |
|-------------------|----------------------------------------------------|-------------------------------------------------------------------------------------------------------------|
| Bacterial strains | <i>Bifidobacterium longum</i> NCC2705              | Transformation host                                                                                         |
|                   | <i>Bifidobacterium breve</i> JCM 1192              | Transformation host                                                                                         |
|                   | <i>Bifidobacterium adolescentis</i> ATCC 15703     | Transformation host                                                                                         |
|                   | <i>Escherichia coli</i> TOP10                      | Transformation host                                                                                         |
| Plasmids          | pBCMAT-P <sub>gap</sub> -T <sub>dppA2</sub>        | <i>Sp<sup>r</sup></i> , <i>Cm<sup>r</sup></i> , P <sub>gap</sub> , T <sub>dppA2</sub> , Template for PCR    |
|                   | pBCMAT-P <sub>rpmB</sub> -T <sub>dppA2</sub>       | <i>Sp<sup>r</sup></i> , <i>Cm<sup>r</sup></i> , P <sub>rpmB</sub> , T <sub>dppA2</sub> , Template for PCR   |
|                   | pBCMAT-P <sub>groES</sub> -T <sub>dppA2</sub>      | <i>Sp<sup>r</sup></i> , <i>Cm<sup>r</sup></i> , P <sub>groES</sub> , T <sub>dppA2</sub> , Template for PCR  |
|                   | pBCMAT-P <sub>rpmH</sub> -T <sub>dppA2</sub>       | <i>Sp<sup>r</sup></i> , <i>Cm<sup>r</sup></i> , P <sub>rpmH</sub> , T <sub>dppA2</sub> , Template for PCR   |
|                   | pBCMAT-P <sub>BL143</sub> -T <sub>dppA2</sub>      | <i>Sp<sup>r</sup></i> , <i>Cm<sup>r</sup></i> , P <sub>BL143</sub> , T <sub>dppA2</sub> , Template for PCR  |
|                   | pBCMAT-P <sub>rplU</sub> -T <sub>dppA2</sub>       | <i>Sp<sup>r</sup></i> , <i>Cm<sup>r</sup></i> , P <sub>rplU</sub> , T <sub>dppA2</sub> , Template for PCR   |
|                   | pBCMAT-P <sub>tuf</sub> -T <sub>dppA2</sub>        | <i>Sp<sup>r</sup></i> , <i>Cm<sup>r</sup></i> , P <sub>tuf</sub> , T <sub>dppA2</sub>                       |
|                   | pBCMAT-P <sub>rplM</sub> -T <sub>dppA2</sub>       | <i>Sp<sup>r</sup></i> , <i>Cm<sup>r</sup></i> , P <sub>rplM</sub> , T <sub>dppA2</sub> , Template for PCR   |
|                   | pBCMAT-P <sub>hup</sub> -T <sub>dppA2</sub>        | <i>Sp<sup>r</sup></i> , <i>Cm<sup>r</sup></i> , P <sub>hup</sub> , T <sub>dppA2</sub>                       |
|                   | pBCMAT-P <sub>BL1230</sub> -T <sub>dppA2</sub>     | <i>Sp<sup>r</sup></i> , <i>Cm<sup>r</sup></i> , P <sub>BL1230</sub> , T <sub>dppA2</sub> , Template for PCR |
|                   | pBCMAT-P <sub>BL1769</sub> -T <sub>dppA2</sub>     | <i>Sp<sup>r</sup></i> , <i>Cm<sup>r</sup></i> , P <sub>BL1769</sub> , T <sub>dppA2</sub>                    |
|                   | pBCMAT-P <sub>gap-imp</sub> -T <sub>dppA2</sub>    | <i>Sp<sup>r</sup></i> , <i>Cm<sup>r</sup></i> , P <sub>gap-imp</sub> , T <sub>dppA2</sub>                   |
|                   | pBCMAT-P <sub>groES-imp</sub> -T <sub>dppA2</sub>  | <i>Sp<sup>r</sup></i> , <i>Cm<sup>r</sup></i> , P <sub>groES-imp</sub> , T <sub>dppA2</sub>                 |
|                   | pBCMAT-P <sub>rpmH-imp</sub> -T <sub>dppA2</sub>   | <i>Sp<sup>r</sup></i> , <i>Cm<sup>r</sup></i> , P <sub>rpmH-imp</sub> , T <sub>dppA2</sub>                  |
|                   | pBCMAT-P <sub>BL143-imp</sub> -T <sub>dppA2</sub>  | <i>Sp<sup>r</sup></i> , <i>Cm<sup>r</sup></i> , P <sub>BL143-imp</sub> , T <sub>dppA2</sub>                 |
|                   | pBCMAT-P <sub>rplU-imp</sub> -T <sub>dppA2</sub>   | <i>Sp<sup>r</sup></i> , <i>Cm<sup>r</sup></i> , P <sub>rplU-imp</sub> , T <sub>dppA2</sub>                  |
|                   | pBCMAT-P <sub>rplM-imp</sub> -T <sub>dppA2</sub>   | <i>Sp<sup>r</sup></i> , <i>Cm<sup>r</sup></i> , P <sub>rplM-imp</sub> , T <sub>dppA2</sub>                  |
|                   | pBCMAT-P <sub>BL1230-imp</sub> -T <sub>dppA2</sub> | <i>Sp<sup>r</sup></i> , <i>Cm<sup>r</sup></i> , P <sub>BL1230-imp</sub> , T <sub>dppA2</sub>                |
|                   | pBCMAT-P <sub>gap-rpmB</sub> -T <sub>dppA2</sub>   | <i>Sp<sup>r</sup></i> , <i>Cm<sup>r</sup></i> , P <sub>gap-rpmB</sub> (Chimeric), T <sub>dppA2</sub>        |
|                   | pBCMAT-P <sub>gap-rplM</sub> -T <sub>dppA2</sub>   | <i>Sp<sup>r</sup></i> , <i>Cm<sup>r</sup></i> , P <sub>gap-rplM</sub> (Chimeric), T <sub>dppA2</sub>        |
|                   | pBCMAT-P <sub>gap-rplU</sub> -T <sub>dppA2</sub>   | <i>Sp<sup>r</sup></i> , <i>Cm<sup>r</sup></i> , P <sub>gap-rplU</sub> (Chimeric), T <sub>dppA2</sub>        |
|                   | pBCMAT-P <sub>rpmB-gap</sub> -T <sub>dppA2</sub>   | <i>Sp<sup>r</sup></i> , <i>Cm<sup>r</sup></i> , P <sub>rpmB-gap</sub> (Chimeric), T <sub>dppA2</sub>        |
|                   | pBCMAT-P <sub>rplM-gap</sub> -T <sub>dppA2</sub>   | <i>Sp<sup>r</sup></i> , <i>Cm<sup>r</sup></i> , P <sub>rplM-gap</sub> (Chimeric), T <sub>dppA2</sub>        |
|                   | pBCMAT-P <sub>gap</sub> -T <sub>rplQ</sub>         | <i>Sp<sup>r</sup></i> , <i>Cm<sup>r</sup></i> , P <sub>gap</sub> , T <sub>rplQ</sub>                        |
|                   | pBCMAT-P <sub>gap</sub> -T <sub>rplL</sub>         | <i>Sp<sup>r</sup></i> , <i>Cm<sup>r</sup></i> , P <sub>gap</sub> , T <sub>rplL</sub>                        |
|                   | pBCMAT-P <sub>gap</sub> -T <sub>BL0593</sub>       | <i>Sp<sup>r</sup></i> , <i>Cm<sup>r</sup></i> , P <sub>gap</sub> , T <sub>BL0593</sub>                      |
|                   | pBCMAT-P <sub>gap</sub> -T <sub>tuf</sub>          | <i>Sp<sup>r</sup></i> , <i>Cm<sup>r</sup></i> , P <sub>gap</sub> , T <sub>tuf</sub>                         |
|                   | pBCMAT-P <sub>gap</sub> -T <sub>tal</sub>          | <i>Sp<sup>r</sup></i> , <i>Cm<sup>r</sup></i> , P <sub>gap</sub> , T <sub>tal</sub>                         |
|                   | pBCMAT-P <sub>gap</sub> -T <sub>rpsO</sub>         | <i>Sp<sup>r</sup></i> , <i>Cm<sup>r</sup></i> , P <sub>gap</sub> , T <sub>rpsO</sub>                        |
|                   | pBCMAT-P <sub>gap</sub> -T <sub>BL0618</sub>       | <i>Sp<sup>r</sup></i> , <i>Cm<sup>r</sup></i> , P <sub>gap</sub> , T <sub>BL0618</sub>                      |
|                   | pBCMAT-P <sub>gap</sub> -T <sub>gap</sub>          | <i>Sp<sup>r</sup></i> , <i>Cm<sup>r</sup></i> , P <sub>gap</sub> , T <sub>gap</sub>                         |
|                   | pBCMAT-P <sub>gap</sub> -T <sub>ahpC</sub>         | <i>Sp<sup>r</sup></i> , <i>Cm<sup>r</sup></i> , P <sub>gap</sub> , T <sub>ahpC</sub>                        |
|                   | pBCMAT-P <sub>gap</sub> -T <sub>BL0725</sub>       | <i>Sp<sup>r</sup></i> , <i>Cm<sup>r</sup></i> , P <sub>gap</sub> , T <sub>BL0725</sub>                      |
|                   | pBCMAT-P <sub>gap</sub> -T <sub>nhaA</sub>         | <i>Sp<sup>r</sup></i> , <i>Cm<sup>r</sup></i> , P <sub>gap</sub> , T <sub>nhaA</sub>                        |
|                   | pBCMAT-P <sub>gap</sub> -T <sub>rpsO-imp</sub>     | <i>Sp<sup>r</sup></i> , <i>Cm<sup>r</sup></i> , P <sub>gap</sub> , T <sub>rpsO-imp</sub>                    |
|                   | pBIFGLOW-P <sub>gap</sub> -T <sub>dppA2</sub>      | <i>Sp<sup>r</sup></i> , <i>evoglow-Bs2</i> , P <sub>gap</sub> , T <sub>dppA2</sub>                          |
|                   | pBIFGLOW-P <sub>rpmB</sub> -T <sub>dppA2</sub>     | <i>Sp<sup>r</sup></i> , <i>evoglow-Bs2</i> , P <sub>rpmB</sub> , T <sub>dppA2</sub>                         |
|                   | pKKT427                                            | Template for PCR, [2]                                                                                       |
|                   | pGLOW-Bs2                                          | Template for PCR, [3]                                                                                       |
|                   | pKO403-TPCTcon                                     | Template for PCR, [1]                                                                                       |

Table S2. Primers for cloning of promoters and terminators.

| Name              | Sequences (5' → 3')                     |
|-------------------|-----------------------------------------|
| tufpF             | ccagctcttcgACACGCGCCACTGCATGAA          |
| tufpR             | ccagctcttcgCATCTGGACGTCTCGTGAGTTT       |
| gappF             | ccagctcttcgACATTCGCTGACTTGCATGCC        |
| gappR             | ccagctcttcgCATTGTAGGGTGGCCTTGGC         |
| huppF             | ccagctcttcgACACGTCTATTTTCATACCCCT       |
| huppR             | ccagctcttcgCATGTCAGGGGACAAGCACTT        |
| BL1230pF          | ccagctcttcgACACCTTACCTCTTCGGGAAA        |
| BL1230pR          | ccagctcttcgCATAAAAATTACTGACAATTA        |
| rpmHpF            | ccagctcttcgACATGGCGAAATACGTACAAC        |
| rpmHpR            | ccagctcttcgCATCTATTCGGCAACGCTTC         |
| BLt43pF           | ccagctcttcgACAGAAGAGTCGCGTGCCAC         |
| BLt43pR           | ccagctcttcgCATCCACCTCGGCATGC            |
| groESpF           | ccagctcttcgACAGCGTTGCGATTTCGACGAT       |
| groESpR           | ccagctcttcgCATCGTATCTACTTGTAGTTTGA      |
| rpmBpF            | ccagctcttcgACATCGGGTAAACGCTATGA         |
| rpmBpR            | ccagctcttcgCATGTGTCAAGTCTTTCACG         |
| rplUpF            | ccagctcttcgACAGCGGAAGAGTAACAGGTG        |
| rplUpR            | ccagctcttcgCATGTTTTGAAAGCTACCTTG        |
| BL1769pF          | ccagctcttcgACATATTGCAGCGTTTATCAG        |
| BL1769pR          | ccagctcttcgCATCTGTGAGTTTCTCCAA          |
| rplMpF            | ccagctcttcgACATAGGTGAGTCGGTTAGCC        |
| rplMpR            | ccagctcttcgCATGCTGCTTGGTGTGGCTTG        |
| taltF             | ccagctcttcgTGAGATTTGACGACTGATG          |
| taltR             | ccagctcttcgTTCGTACCACTGTAGCAAC          |
| tuftF             | ccagctcttcgTGATTTTCATCAGACAAGA          |
| tuftR             | ccagctcttcgTTCAGTCGTGGTACATATC          |
| gaptF             | ccagctcttcgTGAACCAATTGCGGTATAGG         |
| gaptR             | ccagctcttcgTTCCTTATCATGCTTGCTT          |
| rplLtF            | ccagctcttcgTGATTTGTGCGGCATAAGC          |
| rplLtR            | ccagctcttcgTTCGATCGCGTTCTCCGCC          |
| rplQtF            | ccagctcttcgTGAGCTGAATAGCGTTTCG          |
| rplQtR            | ccagctcttcgTTCGGCCGTACGTACGTTG          |
| dppA2tF           | ccagctcttcgTGAAGTACTGACTGAACGG          |
| dppA2tR           | ccagctcttcgTTCGATGGCGTGAGCAAG           |
| BL0593tF          | ccagctcttcgTGAGTTCCGGCTCGTTGCG          |
| BL0593tR          | ccagctcttcgTTC AACAGGCTAAGGCACG         |
| BL0618tF          | ccagctcttcgTGAGTAAAAGCAGTATTCC          |
| BL0618tR          | ccagctcttcgTTCAGACTCTCTATTTAC           |
| nhaAtF            | ccagctcttcgTGATGGCTTAGACGGTCCC          |
| nhaAtR            | ccagctcttcgTTC AAGGCCTCATCTCGTG         |
| ahpCtF            | ccagctcttcgTGATCGACACTGAATAGGC          |
| ahpCtR            | ccagctcttcgTTC CCCTTACATACACTGG         |
| rpsOtF            | ccagctcttcgTGATTGAAGACTTCCGCC           |
| rpsOtR            | ccagctcttcgTCATTGTTGCCGTTGGCTG          |
| BL0725tF          | ccagctcttcgTGATGACCGGGTGC GGAC          |
| BL0725tR          | ccagctcttcgTTCCTTATTGCGCGTACCG          |
| huptF             | ccagctcttcgCTTCCTTCTGCTCGTAGCGATT       |
| huptR             | ccagctcttcgTGTTGGAAGCGCTGAACTAGTC       |
| CAT+RBS-F         | ccagctcttcgATGCCCTGACCCAAGGAGAACATC     |
| CAT-R             | ccagctcttcgTCATAAAAAGCCAGTCATTAGGC      |
| evoglow-F         | ccagctcttcgATGGCGTCGTTCCAGTCG           |
| evoglow-R         | ccagctcttcgTCACTCGAGCAGCTTTTCATATT      |
| vector-F          | ccagctcttcgGAAGCCACCGTCGCCAAGG          |
| Spectinomycin_r-R | ccagctcttcgAAGGGTTCGATTTTCGTTTCGTGAATAC |
| RBS+ATGcodon-R    | ccagctcttcgCATGATGTTCTCCTTGGGTCA        |

Table S3. Primers for modification of promoters and terminators.

| Name          | Sequences (5' → 3')                |
|---------------|------------------------------------|
| gap-im-F      | CAGAGTCGGCATT <b>TATAAT</b> AGCAAC |
| gap-im-R      | TACACATGGCAACGTTTC                 |
| rplU-im-F     | <b>TATAAT</b> CGAAACTCGGTGTCT      |
| rplU-im-R     | CACCACCATGCGGACTAAA                |
| BLt43-im-F    | <b>TTATAAT</b> AACGACTTGGCGG       |
| BLt43-im-R    | CGGCTCCGGTGGATTAT                  |
| rpmH-im-F     | <b>TAAT</b> GGTATAGCTTGACTCAGC     |
| rpmH-im-R     | <b>TACT</b> CTCACCCCTACCC          |
| groES-im-F    | <b>TAAT</b> GTGTCTTAGCGCAA         |
| groES-im-R    | <b>TAG</b> CGCGATTATTAGCACT        |
| BL1230-im-F   | CATT <b>TATAAT</b> CATAATTGTCAG    |
| BL1230-im-R   | AATGATAATTTGAATCACAAT              |
| rplM-im-F     | <b>ATATAAT</b> AGTGGATTGTTGTGT     |
| rplM-im-R     | CGCCGGGCTTGACATA                   |
| rpsO_ter-im-F | GTACCTAGGATGGTGCTC                 |
| rpsO_ter-im-R | TCGGGCGT <b>TTTT</b> CTTCAATC      |
| rplU-chi-F    | ccagctcttcgTGTCTGACCGCAAGCTC       |
| rpmB-chi-F    | ccagctcttcgTGTGTTCCGGCATGTCGG      |
| rplM-chi-F    | ccagctcttcgTGTGTTCCCTAAGGGGTC      |
| gap-chi-F     | ccagctcttcgTGTTGGTAAACAATGGCCCG    |
| rpmB-chi-R    | ccagctcttcgACACAACCTCACAAATATATAGC |
| rplM-chi-R    | ccagctcttcgACAACAATCCACTAGTATATCGC |
| gap-chi-R     | ccagctcttcgACAGTTGCTACTGTAATGCCGA  |
| gappR         | ccagctcttcgCATTGTAGGGTGGCCTTGGC    |
| rplUpR        | ccagctcttcgCATGTTTTGGAAAGCTACCTTG  |
| rpmBpR        | ccagctcttcgCATGTGTCAAGTCTTTCACG    |
| rplMpR        | ccagctcttcgCATGCTGCTTGGTGTGGCTTG   |
| RBS-F         | ccagctcttcgATGCCCTGACCCAAGGAGAACAT |

Table S4. Reporter genes for *Bifidobacterium*.

| Gene                              | Length   | References |
|-----------------------------------|----------|------------|
| $\beta$ -glucuronidase            | 1.8 kbp  | [4]        |
| $\alpha$ -galactosidase           | 2.3 kbp  | [5]        |
| arabinofuranosidase               | 1.7 kbp  | [6]        |
| $\beta$ -glucosidase              | 1.4 kbp  | [7]        |
| luciferase                        | 5.6 kbp  | [8]        |
| Chloramphenicol acetyltransferase | 0.65 kbp | This study |

## References

1. Kozakai T, Izumi A, Horigome A, Odamaki T, Xiao JZ, Nomura I, Suzuki T. 2020. Structure of a Core Promoter in *Bifidobacterium longum* NCC2705. *J Bacteriol* 202:e00540-19.
2. Yasui K, Kano Y, Tanaka K, Watanabe K, Shimizu-Kadota M, Yoshikawa H, Suzuki T. 2009. Improvement of bacterial transformation efficiency using plasmid artificial modification. *Nucleic Acids Res* 37:e3–e3.
3. Drepper T, Eggert T, Circolone F, Heck A, Krauß U, Guterl JK, Wendorff M, Losi A, Gärtner W, Jaeger KE. 2007. Reporter proteins for *in vivo* fluorescence without oxygen. *Nat Biotechnol* 25:443–445.
4. Klijn A, Moine D, Delley M, Mercenier A, Arigoni F, Pridmore RD. 2006. Construction of a reporter vector for the analysis of *Bifidobacterium longum* promoters. *Appl Environ Microbiol* 72:7401–7405.
5. Sakanaka M, Tamai S, Hirayama Y, Onodera A, Koguchi H, Kano Y, Yokota A, Fukiya S. 2014. Functional analysis of bifidobacterial promoters in *Bifidobacterium longum* and *Escherichia coli* using the  $\alpha$ -galactosidase gene as a reporter. *J Biosci Bioeng* 118:489–495.
6. Ruiz L, Álvarez-Martín P, Mayo B, de los Reyes-Gavilán CG, Gueimonde M, Margolles A. 2012. Controlled gene expression in bifidobacteria by use of a bile-responsive element. *Appl Environ Microbiol* 78:581–585.
7. Wang Y, Kim JY, Park MS, Ji GE. 2012. Novel *Bifidobacterium* promoters selected through microarray analysis lead to constitutive high-level gene expression. *J Microbiol* 50:638–643.
8. Cronin M, Sleator RD, Hill C, Fitzgerald GF, Van Sinderen D. 2008. Development of a luciferase-based reporter system to monitor *Bifidobacterium breve* UCC2003 persistence in mice. *BMC Microbiol* 8:161.
